# Supplementary material for: Spermine-mediated metabolic homeostasis improves growth and stress tolerance in creeping bentgrass (Agrostis stolonifera) under water or high-temperature stress
Source: Frontiers journal article supplement (doi:10.3389/fpls.2022.944358), 2022-08-11
Supplement: Presentation_1.pdf [file Presentation_1.pdf]

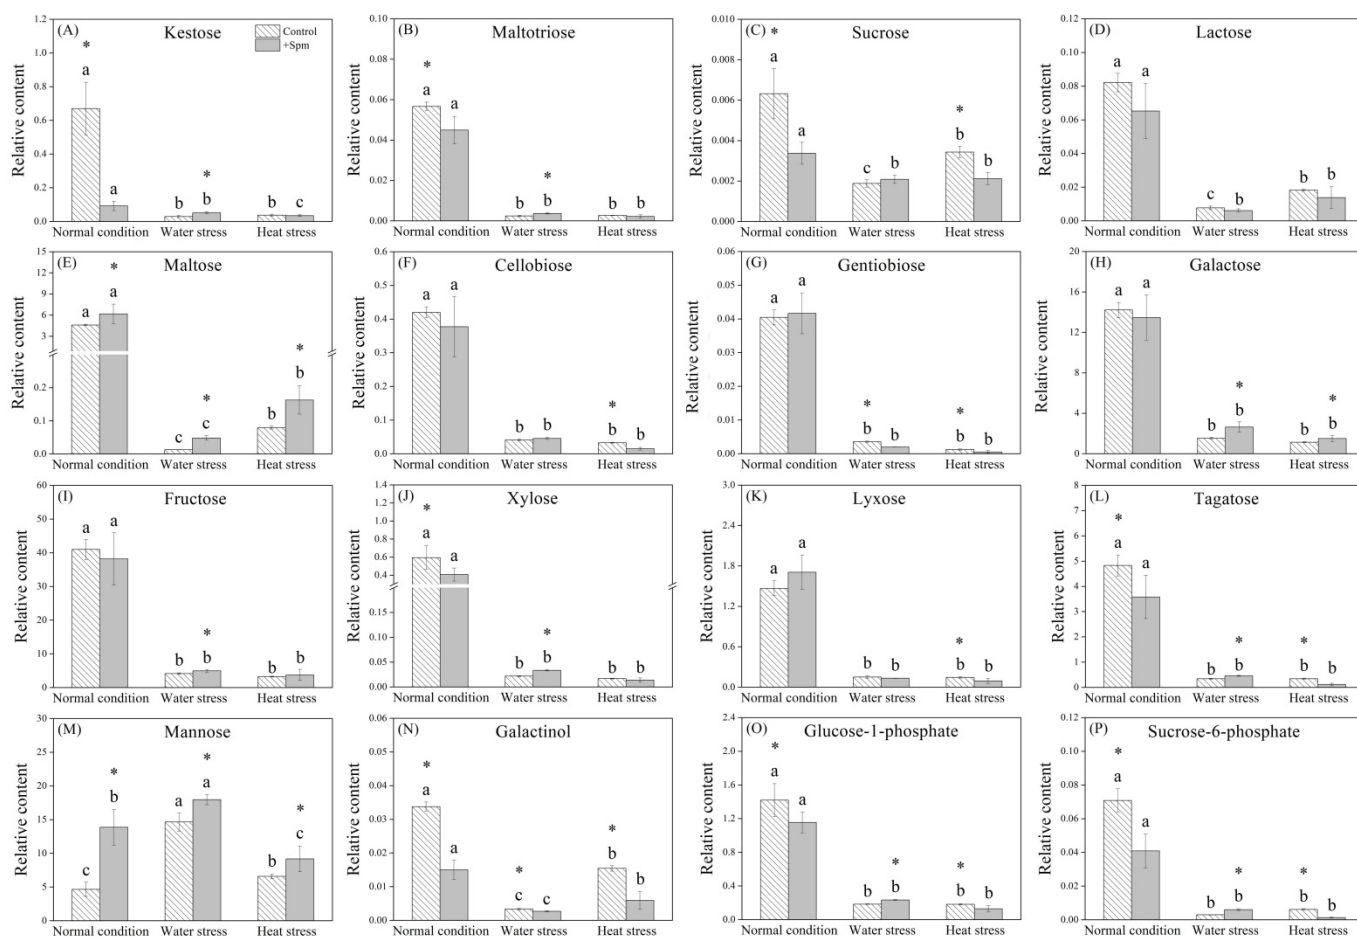

**Fig. S1** Changes in relative content of 16 sugars in response to the Spm application under different conditions. Vertical bars indicate  $\pm$ SE of mean ( $n=4$ ). Different letters above striated or gray columns indicate significant differences for a particular treatment (Control or +Spm) for comparison among normal condition, water stress, and heat stress; the asterisk “\*” indicates significant differences between the Control and the +Spm under one particular condition (normal condition, water stress, or heat stress) based on LSD ( $P<0.05$ ).

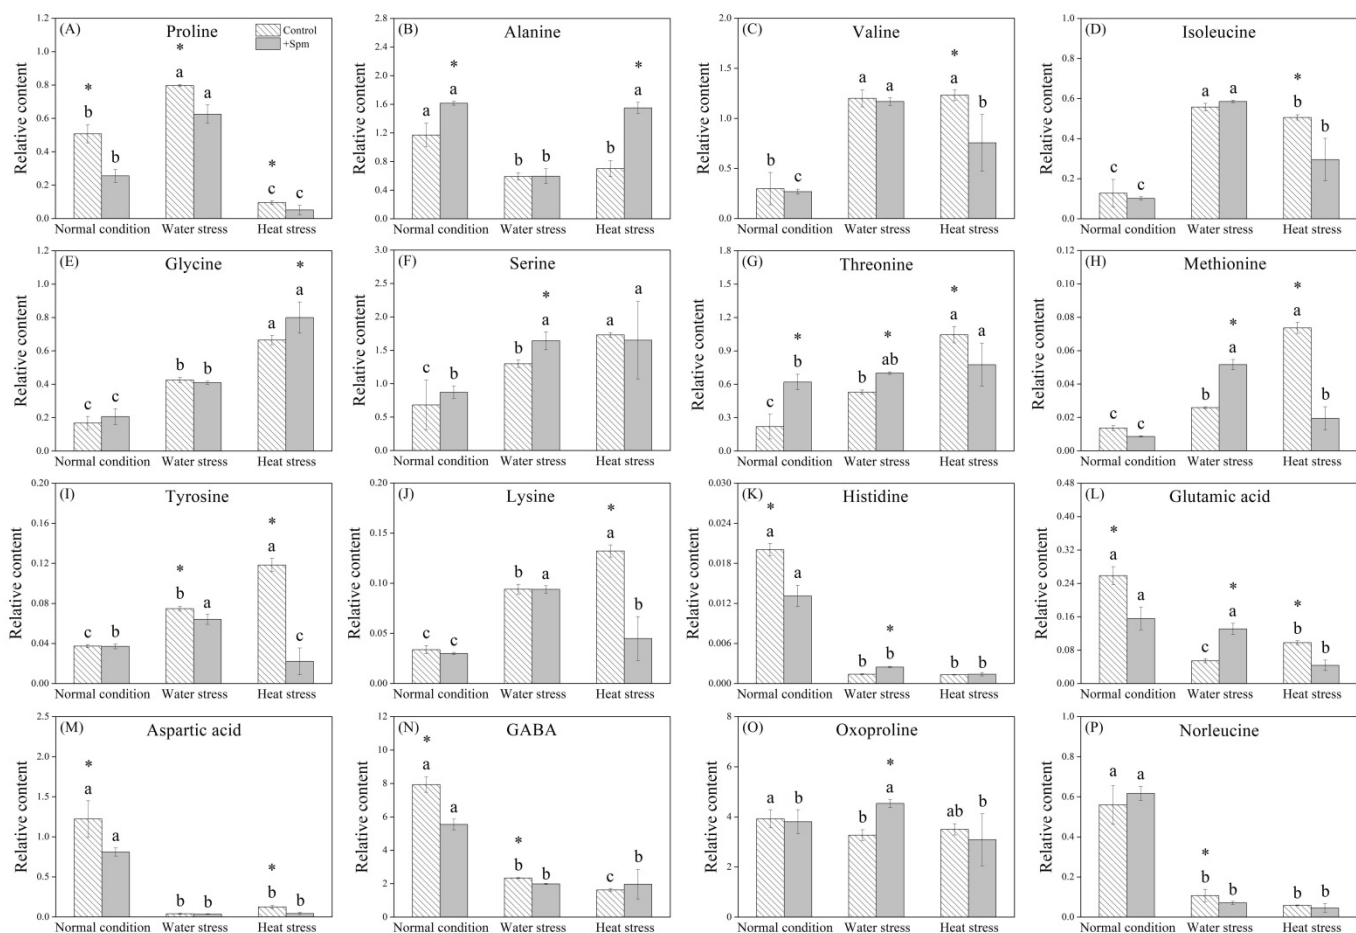

**Fig. S2** Changes in relative content of 16 amino acids in response to the Spm application under different conditions. Vertical bars indicate  $\pm$ SE of mean ( $n=4$ ). Different letters above striated or gray columns indicate significant differences for a particular treatment (Control or +Spm) for comparison among normal condition, water stress, and heat stress; the asterisk “\*” indicates significant differences between the Control and the +Spm under one particular condition (normal condition, water stress, or heat stress) based on LSD ( $P<0.05$ ).

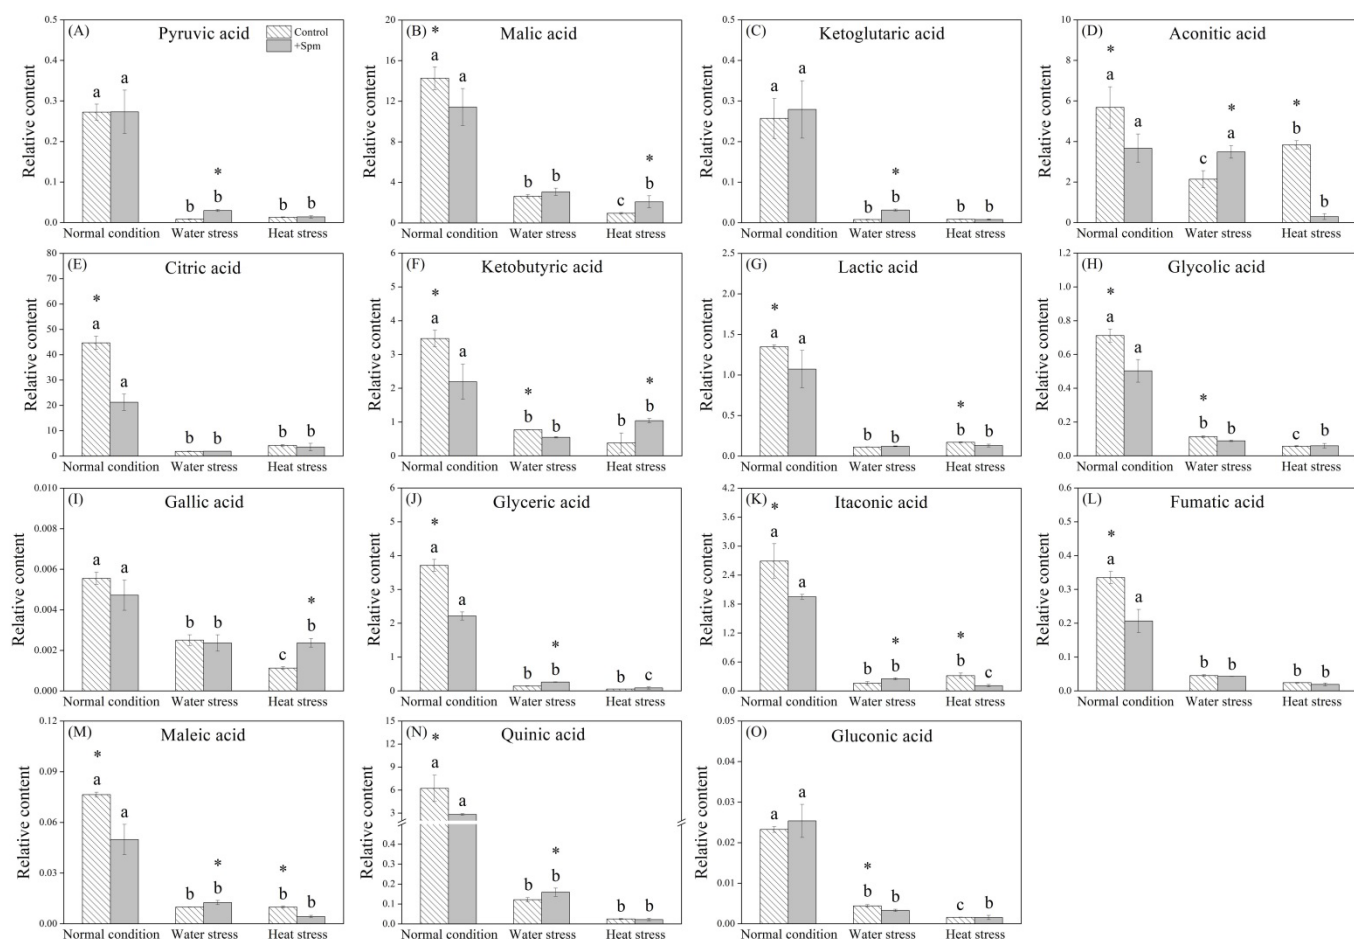

**Fig. S3** Changes in relative content of 15 organic acids in response to the Spm application under different conditions. Vertical bars indicate  $\pm$ SE of mean ( $n=4$ ). Different letters above striated or gray columns indicate significant differences for a particular treatment (Control or +Spm) for comparison among normal condition, water stress, and heat stress; the asterisk “\*” indicates significant differences between the Control and the +Spm under one particular condition (normal condition, water stress, or heat stress) based on LSD ( $P<0.05$ ).

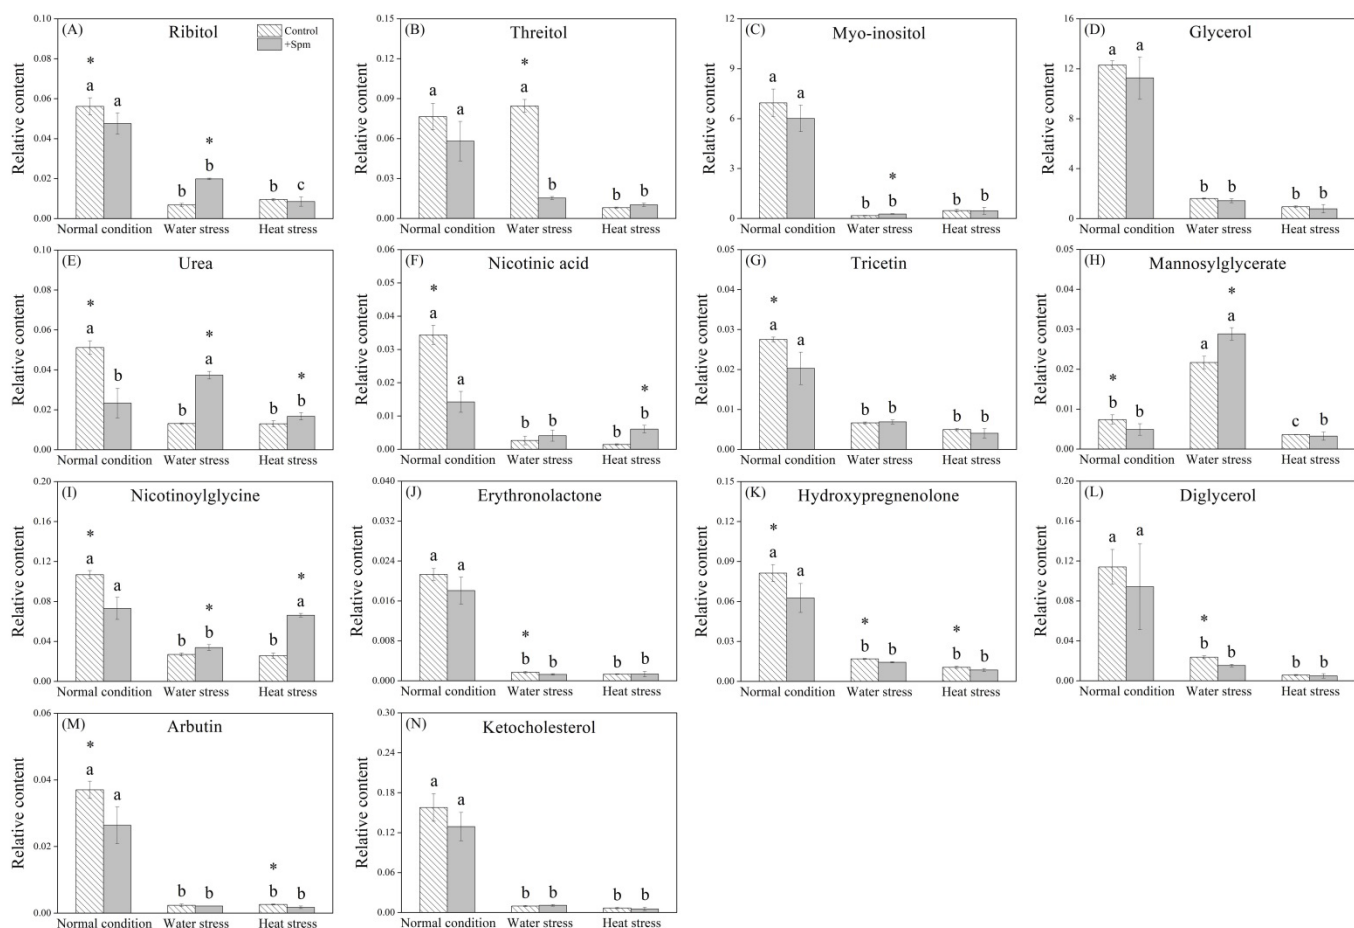

**Fig. S4** Changes in relative content of 14 other metabolites in response to the Spm application under different conditions. Vertical bars indicate  $\pm$ SE of mean ( $n=4$ ). Different letters above striated or gray columns indicate significant differences for a particular treatment (Control or +Spm) for comparison among normal condition, water stress, and heat stress; the asterisk “\*” indicates significant differences between the Control and the +Spm under one particular condition (normal condition, water stress, or heat stress) based on LSD ( $P<0.05$ ).
